# Supplementary material for: Clinical evaluation of integrated panel testing by next-generation sequencing for somatic mutations in neuroblastomas with MYCN unamplification
Source: PubMed Central journal article supplement (PMC5564799; doi:10.18632/oncotarget.17917), 2017-05-17
Supplement: oncotarget-08-49689-s001.pdf [file oncotarget-08-49689-s001.pdf]

## Clinical evaluation of integrated panel testing by next-generation sequencing for somatic mutations in neuroblastomas with MYCN unamplification

### Supplementary Materials

**Supplementary Table 1: Clinical data of 33 patients**

| "Patients NO." | Gender | "Age (month)" | INSS | "Distance metastasis" | INPC | "NSE (ng/mL)" |
|----------------|--------|---------------|------|-----------------------|------|---------------|
| 1              | male   | 16            | 3    | –                     | FH   | 38.25         |
| 2              | female | 72            | 4    | +                     | UH   | 137.1         |
| 3              | female | 6             | 3    | –                     | FH   | 219.5         |
| 4              | male   | 13            | 1    | –                     | FH   | 28.94         |
| 5              | female | 11            | 1    | –                     | UH   | 20.35         |
| 6              | male   | 53            | 4    | +                     | UH   | 65.39         |
| 7              | male   | 36            | 1    | –                     | FH   | 44.14         |
| 8              | male   | 40            | 4    | +                     | UH   | 1282          |
| 9              | female | 11            | 4s   | +                     | FH   | 120.8         |
| 10             | male   | 27            | 4    | +                     | UH   | 595.2         |
| 11             | male   | 12            | 4    | +                     | UH   | 790.7         |
| 12             | male   | 8             | 3    | –                     | FH   | 209.2         |
| 13             | female | 11            | 3    | –                     | FH   | 79.77         |
| 14             | female | 108           | 1    | –                     | UH   | 19.81         |
| 15             | female | 47            | 4    | +                     | UH   | 1008          |
| 16             | female | 81            | 4    | +                     | UH   | 344.1         |
| 17             | female | 71            | 4    | +                     | UH   | 1398          |
| 18             | male   | 5             | 1    | –                     | FH   | 22.81         |
| 19             | male   | 67            | 4    | +                     | UH   | 112.2         |
| 20             | male   | 57            | 4    | +                     | FH   | 502           |
| 21             | male   | 72            | 3    | –                     | FH   | 224.4         |
| 22             | male   | 39            | 4    | +                     | UH   | 432.53        |
| 23             | female | 15            | 1    | –                     | FH   | 14.86         |
| 24             | male   | 38            | 2    | –                     | FH   | 36.7          |
| 25             | female | 8             | 2    | –                     | UH   | 82.66         |
| 26             | male   | 52            | 4    | +                     | UH   | 230.9         |
| 27             | female | 53            | 1    | –                     | FH   | 12.45         |
| 28             | female | 48            | 4    | +                     | UH   | 1185          |
| 29             | female | 15            | 1    | –                     | FH   | 23.66         |
| 30             | female | 62            | 4    | +                     | UH   | 320.3         |
| 31             | female | 40            | 4    | +                     | FH   | 354.4         |
| 32             | male   | 42            | 4    | +                     | FH   | 240.3         |
| 33             | female | 36            | 4    | +                     | UH   | 518.7         |

## Supplementary Table 2: Panel design and NGS data quality assessment

|             |              |               |               |               |               |               |
|-------------|--------------|---------------|---------------|---------------|---------------|---------------|
| <i>17q</i>  | <i>CDK4</i>  | <i>MDM2</i>   | <i>MYCN</i>   | <i>ALK</i>    | <i>FGFR4</i>  | <i>CCND1</i>  |
| <i>CDK6</i> | <i>DDX1</i>  | <i>GLI1</i>   | <i>NBAS</i>   | <i>ODC1</i>   | <i>OS9</i>    | <i>YEATS4</i> |
| <i>11q</i>  | <i>1p36</i>  | <i>ATRX</i>   | <i>ARID1A</i> | <i>ARID1B</i> | <i>CDKN2A</i> | <i>CDKN1C</i> |
| <i>H19</i>  | <i>IGF2</i>  | <i>RBMS3</i>  | <i>PTEN</i>   | <i>PTPRD</i>  | <i>PHOX2B</i> | <i>LMO1</i>   |
| <i>APC</i>  | <i>AXIN2</i> | <i>BRAF</i>   | <i>CTNNB1</i> | <i>FBXW7</i>  | <i>HRAS</i>   | <i>KRAS</i>   |
| <i>NF1</i>  | <i>NRAS</i>  | <i>PIK3CA</i> | <i>PTPN11</i> | <i>TIAM1</i>  | <i>TP53</i>   | <i>BARD1</i>  |
| <i>BCOR</i> | <i>BRCA1</i> | <i>BRCA2</i>  | <i>CHEK2</i>  | <i>EGFR</i>   | <i>ERBB2</i>  | <i>FANCA</i>  |
| <i>KIT</i>  | <i>PALB2</i> | <i>PDGFRA</i> | <i>PINK1</i>  | <i>PTCH1</i>  | <i>RB1</i>    | <i>WT1</i>    |

Our panel, mainly CNV-based, covers most of the chromosomal regions and candidate genes which have been reported to associate with neuroblastoma. We developed the panel to select 3 large chromosomal regions (17q, 11q and 1p36) that are most reported and others associated with MYCN amplification or not, including MYCN itself and ALK, DDX, CDK4, CDK6, MDM2, CCND1, FGFR4, GLI1, NBAS, ODC1, OS9, YEATS4, deleted on ATRX, ARID1A, ARID1B, CDKN2A, CDKN1C, H19, IGF2, RBMS3, PTEN, PTPRD, TIAM1 and NF1. In order to expand the screening of somatic mutations of neuroblastoma, the panel we designed also includes important genes with somatic mutations found previously in neuroblastoma, for example, PTPN11, PHOX2B, BARD1, PTCH1, TP53, CHEK2, BRCA1, BRCA2, HRAS, KRAS, NRAS, PIK3CA and BRAF. Overall, our neuroblastoma panel, spans 53 genes and 3 large chromosome regions.

Description: The gray shade is the area that is captured based on the CNVs, and the other is the capture area based on the point mutations.

All of the 33 tissue and leukocyte samples sequenced were then subjected to stringent QC allegations. The mean coverage depth in all of the target regions in all of the samples was 887×, and the mapped read percentage was over 99%. The imputed insert size and library complexity statistics shown in Supplementary Figure 1 revealed a mean insert size of 212 bp, and these findings indicated a high capture efficiency of the probes.

## Supplementary Table 3: The detailed quality control data of 33 samples.

See Supplementary\_Table\_3.

**Supplementary Table 4: List of the 17 high-confidence somatic mutations identified among 33 patients**

| Patient NO. | Gene          | Mutation_Type      | Exon Rank | Description | AF     | CHROM        | Reference  |
|-------------|---------------|--------------------|-----------|-------------|--------|--------------|------------|
| 02          | <i>ALK</i>    | missense_variant   | 23        | p.F1174L    | 6.50%  | 2p23.2-p23.1 | [1]        |
|             | <i>CDK4</i>   | cn_amp             | NA        | cn_amp      | 6.69   | 12q14.1      | [2]        |
|             | <i>OS9</i>    | cn_amp             | NA        | cn_amp      | 5.13   | 12q13.3      | [3]        |
| 04          | <i>BRCA2</i>  | missense_variant   | 14        | p.K2392N    | 4.89%  | 13q13.1      | [4, 5]     |
| 05          | <i>TIAM1</i>  | cn_del             | NA        | cn_del      | 1.5    | 21q22.11     | <b>NEW</b> |
| 06          | <i>11q</i>    | cn_del             | NA        | cn_del      | 1.21   | 11q          | [6]        |
|             | <i>CDKN1C</i> | cn_del             | NA        | cn_del      | 1.32   | 11p15.4      | [2]        |
|             | <i>H19</i>    | cn_del             | NA        | cn_del      | 1.23   | 11p15.5      | [7, 8]     |
|             | <i>RBMS3</i>  | cn_del             | NA        | cn_del      | 1.19   | 3p24.1       | [9]        |
| 08          | <i>PHOX2B</i> | frameshift_variant | 2         | p.F86fs     | 9.10%  | 4p13         | [10]       |
| 16          | <i>ALK</i>    | missense_variant   | 23        | p.F1174L    | 16.20% | 2p23.2-p23.1 | [1]        |
| 28          | <i>DDX1</i>   | cn_amp             | NA        | cn_amp      | 10.05  | 2p24.3       | [11]       |
|             | <i>MYCN</i>   | cn_amp             | NA        | cn_amp      | 10.52  | 2p24.3       | [11]       |
| 33          | <i>CDK4</i>   | cn_amp             | NA        | cn_amp      | 3.46   | 12q14.1      | [2]        |
| 10          | <i>CCND1</i>  | cn_amp             | NA        | cn_amp      | 2.93   | 11q13.3      | [2]        |
| 11          | <i>CDKN2A</i> | cn_del             | NA        | cn_del      | 1.02   | 9p21.3       | [2, 9]     |
| 30          | <i>CCND1</i>  | cn_amp             | NA        | cn_amp      | 2.96   | 11q13.3      | [2]        |

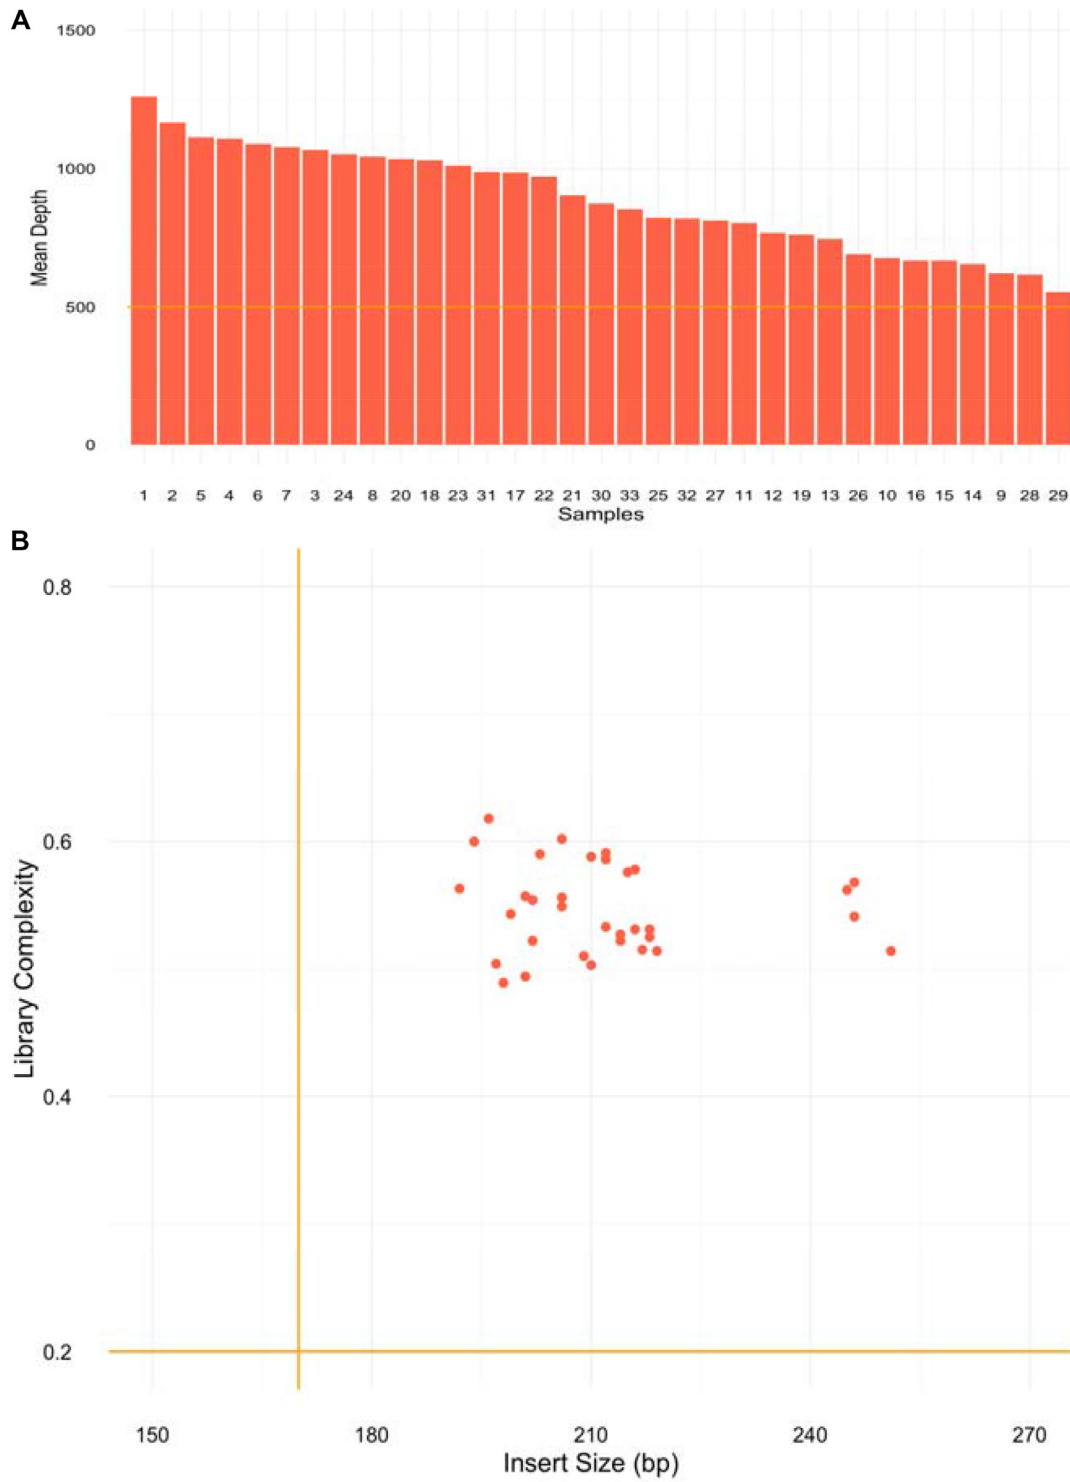

**Supplementary Figure 1: Quality assessment of the targeted sequencing data among 33 samples.** (A) The mean sequencing depth of 33 samples (the mean coverage depth was well distributed among regions, with a minimum of 554× and a maximum of 1259×); (B) The insert size and Library complexity of 33 samples (The insert size means insertion length, to measure the degree of DNA degradation, more than 170 is qualified. Library complexity means the complexity of the library, used to measure the number of the original DNA template, more than 0.2 is qualified. Insert size and covered library complexity of our 33 samples were qualified).

## REFERENCES

1. Berry T, Luther W, Bhatnagar N, Jamin Y, Poon E, Sanda T, Pei D, Sharma B, Vetharoy WR, Hallsworth A, Ahmad Z, Barker K, Moreau L, et al. The ALK(F1174L) mutation potentiates the oncogenic activity of MYCN in neuroblastoma. *Cancer cell*. 2012; 22:117–130.
2. Molenaar JJ, Koster J, Ebus ME, van Sluis P, Westerhout EM, de Preter K, Gisselsson D, Ora I, Speleman F, Caron HN, Versteeg R. Copy number defects of G1-cell cycle genes in neuroblastoma are frequent and correlate with high expression of E2F target genes and a poor prognosis. *Genes, chromosomes & cancer*. 2012; 51:10–19.
3. Liu C, Li D, Hu J, Jiang J, Zhang W, Chen Y, Cui X, Qi Y, Zou H, Zhang W, Li F. Chromosomal and genetic imbalances in Chinese patients with rhabdomyosarcoma detected by high-resolution array comparative genomic hybridization. *International journal of clinical and experimental pathology*. 2014; 7:690–698.
4. Loizidou MA, Hadjisavvas A, Tanteles GA, Spanou-Aristidou E, Kyriacou K, Christophidou-Anastasiadou V. Fanconi anemia-D1 due to homozygosity for the BRCA2 gene Cypriot founder mutation: A case report. *Oncology letters*. 2016; 11:471–473.
5. Malric A, Defachelles AS, Leblanc T, Lescoeur B, Lacour B, Peuchmaur M, Maurage CA, Pierron G, Guillemot D, d'Enghien CD, Soulier J, Stoppa-Lyonnet D, Bourdeaut F. Fanconi anemia and solid malignancies in childhood: a national retrospective study. *Pediatric blood & cancer*. 2015; 62:463–470.
6. Sridhar S, Al-Moallem B, Kamal H, Terrile M, Stallings RL. New insights into the genetics of neuroblastoma. *Molecular diagnosis & therapy*. 2013; 17:63–69.
7. Serra A, Eirich K, Winkler AK, Mrasek K, Gohring G, Barbi G, Cario H, Schlegelberger B, Pokora B, Liehr T, Leriche C, Henne-Bruns D, Barth TF, et al. Shared Copy Number Variation in Simultaneous Nephroblastoma and Neuroblastoma due to Fanconi Anemia. *Molecular syndromology*. 2012; 3:120–130.
8. Wada M, Seeger RC, Mizoguchi H, Koeffler HP. Maintenance of normal imprinting of H19 and IGF2 genes in neuroblastoma. *Cancer research*. 1995; 55:3386–3388.
9. Caren H, Erichsen J, Olsson L, Enerback C, Sjoberg RM, Abrahamsson J, Kogner P, Martinsson T. High-resolution array copy number analyses for detection of deletion, gain, amplification and copy-neutral LOH in primary neuroblastoma tumors: four cases of homozygous deletions of the CDKN2A gene. *BMC genomics*. 2008; 9:353.
10. Normand C, Michon J, Janoueix-Lerosey I, Delattre O, Schleiermacher G. Genetic alterations in neuroblastoma and their usefulness for clinical management. *Bulletin du cancer*. 2011; 98:477–488.
11. Defferrari R, Tonini GP, Conte M, Papio F, Sementa AR, Valent A, Schena F, Perri P, Mazzocco K. Concomitant DDX1 and MYCN gain in neuroblastoma. *Cancer letters*. 2007; 256:56–63.
